# Supplementary material for: Lower cretaceous avian-dominated, theropod, thyreophoran, pterosaur and turtle track assemblages from the Tugulu Group, Xinjiang, China: ichnotaxonomy and palaeoecology
Source: PeerJ. 2021 May 28;9:e11476. doi: 10.7717/peerj.11476 (PMC8166242; doi:10.7717/peerj.11476)
Supplement: Supplemental Information 1 [file peerj-09-11476-s001.xlsx]

## Sheet: Sheet1
Original numbers	References	New numbers
MGCM.H3	Xing et al 2011	YLSNHM01246
MGCM.H5	Xing et al 2011	YLSNHM01235
MGCM.H6	Xing et al 2011	YLSNHM01222
MGCM.H7	Xing et al 2011	YLSNHM01228
MGCM.H11	Xing et al 2011	YLSNHM01209
MGCM.H13	Xing et al 2011	YLSNHM01282
MGCM.H14	Xing et al 2011	YLSNHM00981
MGCM.H16	Xing et al 2011	YLSNHM01240
MGCM.H18	Xing et al 2011	YLSNHM01211
MGCM.H19	Xing et al 2011	YLSNHM01252
MGCM.H20	Xing et al 2011	YLSNHM01201
MGCM.H24	Xing et al 2011	YLSNHM01220
MGCM.H25	Xing et al 2011	YLSNHM01208
MGCM.H26	Xing et al 2011	YLSNHM01239
MGCM.H30	He et al 2013	YLSNHM01202
MGCM.SZ1p	Xing et al 2013c	YLSNHM01262
MGCM.SZ2p	Xing et al 2013c	YLSNHM01259
MGCM.SZ3p	Xing et al 2013c	YLSNHM01261
MGCM.SZ4p	Xing et al 2013c	YLSNHM01257
MGCM.SZ20m	Xing et al 2013c	YLSNHM00963
MGCM.SZ10p	Xing et al 2013c	YLSNHM00964
MGCM.A1	Xing et al 2013d	YLSNHM01249
MGCM.A3	Xing et al 2013d	YLSNHM01221
MGCM.A5	Xing et al 2013d	YLSNHM01204
MGCM.A4	Xing et al 2013d	YLSNHM01207
MGCM.A6	Xing et al 2013d	YLSNHM00977
