# Supplementary material for: Lower cretaceous avian-dominated, theropod, thyreophoran, pterosaur and turtle track assemblages from the Tugulu Group, Xinjiang, China: ichnotaxonomy and palaeoecology
Source: PeerJ. 2021 May 28;9:e11476. doi: 10.7717/peerj.11476 (PMC8166242; doi:10.7717/peerj.11476)
Supplement: Supplemental Information 2 [file peerj-09-11476-s002.xlsx]

## Sheet: theropod
Specimen number	ML	MW	ML/MW	PL	SL	PA	II-III	III-IV	II-IV	M			Abbreviations
HYQ-A-3-1	8.42	7.85	1.07261	50.8	—	—	—	—	54.3	0.14			ML	maximum length
HYQ-A-3-2	10.69	7.58	1.41029	—	—	—	?29.6	?24.2	53.8	0.3			MW	maximum width
HYQ-A-15	10	>7.0	—	—	—	—	25	28	53	—			ML/MW	dimensionless
HYQ-A-16-1	8.97	6.94	1.29251	—	—	—	31.5	44.3	75.8	0.65			PL	pace length
HYQ-A-16-2	5.34	4.46	1.19731	—	—	—	37.6	22	59.6	0.29			SL	stride length
HYQ-A-17-2	10.41	3.97	2.62217	—	—	—	14	15.4	29.4	0.57			PA	pace angulation
HYQ-A-18	8.97	5.51	1.62795	—	—	—	26.8	27.5	54.3	0.64			II-III	the divarication angle between digits II and III
HYQ-A-20-1	9.2	5.11	1.80039	—	—	—	—	—	45.5	0.59			III-IV	the divarication angle between digits III and IV
HYQ-A-20-2	6.68	5.28	1.26515	—	—	—	—	—	56.2	0.3			II-IV	the divarication angle between digits II and IV
HYQ-A-21	8.69	—	—	—	—	—	—	—	—	—			M	Mesaxony
HYQ-A-23	6.16	4.72	1.30508	—	—	—	—	—	60	0.45
HYQ-A-24	8.25	6.75	1.22222	—	—	—	—	—	81.7	0.53
HYQ-D-1-2	15.36	9.55	1.60838	—	—	—	25.1	25.2	50.3	0.92
HYQ-D-2	17.7	11.11	1.59316	—	—	—	27.5	26.9	54.4	0.86
HYQ-D-3-1	17.3	10.76	1.60781	—	—	—	—	—	57.2	0.54
HYQ-D-3-2	15.15	8.39	1.80572	—	—	—	—	—	46.5	0.41
HYQ-D-3-3	15.75	10.75	1.46512	—	—	—	—	—	60	0.46
HYQ-D-3-4	19.07	12.09	1.57734	—	—	—	—	—	50.2	0.71
HYQ-D-4-1	>15.0	7.32	—	—	—	—	—	—	35.4	0.55
HYQ-D-4-2	>15.6	8.5	—	—	—	—	—	—	47	—
HYQ-D-4-3	15.68	11.01	1.42416	—	—	—	—	—	57	0.46
HYQ-D-5	16.4	9.73	1.68551	—	—	—	25.3	24.2	49.5	0.74
HYQ-D-6	16.69	12.09	1.38048	—	—	—	30.4	21.9	52.3	0.58
HYQ-D-7	16.78	11.53	1.45533	—	—	—	29.8	27.6	57.4	0.64
HYQ-D-8	14.91	10.11	1.47478	—	—	—	25.4	30.3	55.7	0.47
HYQ-D-9	19.07	11.86	1.60793	—	—	—	28.8	23.2	52	0.83
HYQ-D-10	13.2	7.83	1.68582	—	—	—	19.5	27.2	46.7	0.62
HYQ-D-11	17.54	10.11	1.73492	—	—	—	25.3	22	47.3	0.65
HYQ-D-12	15.6	10.32	1.51163	—	—	—	—	—	78	0.54
HYQ-D-13-1	15.95	—	—	—	—	—	—	—	73	—
HYQ-D-13-2	>15.0	—	—	—	—	—	—	—	67.4	—
HYQ-D-13-3	12.16	—	—	—	—	—	—	—	—	—
HYQ-D-13-4	12.68	7.45	1.70201	—	—	—	—	—	68.4	0.84
HYQ-D-13-5	13.33	9.41	1.41658	—	—	—	—	—	76.3	0.76
HYQ-D-13-6	—	—	—	—	—	—	—	—	—	—
HYQ-D-13-7	14.25	9.41	1.51435	—	—	—	—	—	51.3	0.54
HYQ-D-13-8	17.78	10.46	1.69981	—	—	—	—	—	51	0.58
HYQ-D-13-9	>12.2	—	—	—	—	—	—	—	59.2	—
HYQ-D-13-10	—	—	—	—	—	—	—	—	—	—
HYQ-D-13-11	11.63	8.5	1.36824	—	—	—	—	—	74	0.63
HYQ-D-13-12	—	—	—	—	—	—	—	—	—	—
HYQ-D-13-13	19.35	9.67	2.00103	—	—	—	—	—	40.2	—
HYQ-D-13-14	16.47	—	—	—	—	—	—	—	—	—
HYQ-D-13-15	13.46	9.54	1.4109	—	—	—	—	—	59.4	0.52
HYQ-D-13-16	13.86	7.84	1.76786	—	—	—	—	—	56.1	0.67
HYQ-D-13-17	11.37	7.06	1.61048	—	—	—	—	—	56.5	0.69
HYQ-D-13-18	12.68	7.45	1.70201	73	150.8	170	—	—	53	0.58
HYQ-D-13-19	15.5	8.24	1.88107	78.4	—	—	—	—	54.4	0.87
HYQ-D-13-20	12.68	7.58	1.67282	—	—	—	—	—	45.2	0.47
HYQ-D-13-21	17.39	8.76	1.98516	—	—	—	—	—	36.5	0.69
HYQ-D-13-22	16.99	8.5	1.99882	—	—	—	—	—	43.2	0.6
HYQ-D-13-23	21.7	8.37	2.59259	—	—	—	—	—	47	1.42
HYQ-D-13-24	13.73	9.28	1.47953	—	—	—	—	—	58.8	0.61
HYQ-D-13-25	14.12	8.24	1.71359	—	—	—	—	—	51	0.67
HYQ-D-13-26	18.82	—	—	—	—	—	—	—	—	—
HYQ-D-13-27	—	—	—	—	—	—	—	—	—	—
HYQ-D-13-28	16.73	8.1	2.06543	—	—	—	—	—	43	0.81
HYQ-D-13-29	14.64	8.89	1.64679	—	—	—	—	—	55.7	0.72
HYQ-D-13-30	12.94	6.67	1.94003	36.8	75.6	166	—	—	54.8	0.94
HYQ-D-13-31	>14.8	9.67	—	39.4	—	—	—	—	60	—
HYQ-D-13-32	14.64	7.32	2	—	—	—	—	—	43.5	0.71
HYQ-D-13-33	11.9	5.75	2.06957	—	—	—	—	—	40.4	0.48
HYQ-D-13-34	13.33	9.93	1.3424	—	—	—	—	—	68.5	0.57
HYQ-D-13-35	13.99	9.54	1.46646	—	—	—	—	—	62.4	0.68
HYQ-D-13-36	16.34	7.84	2.08418	—	—	—	—	—	48.1	0.73
HYQ-D-13-37	15.82	8.5	1.86118	—	—	—	—	—	46.8	0.72
HYQ-D-13-38	—	—	—	—	—	—	—	—	—	—
HYQ-D-13-39	>13.9	11.5	—	—	—	—	—	—	61.4	—
HYQ-D-13-40	>10.2	—	—	—	—	—	—	—	70	—
HYQ-D-13-41	11.5	9.41	1.2221	—	—	—	—	—	75	0.44
HYQ-D-13-42	13.07	6.01	2.17471	—	—	—	—	—	41.1	0.78
HYQ-D-13-43	13.2	7.58	1.74142	—	—	—	—	—	55	0.76
HYQ-D-13-44	15.69	8.89	1.7649	—	—	—	—	—	52.2	0.68
HYQ-D-13-45	—	—	—	—	—	—	—	—	—	—
HYQ-D-13-46	16.6	9.54	1.74004	—	—	—	—	—	54.5	0.74
HYQ-D-13-47	12.16	—	—	—	—	—	—	—	—	—
HYQ-D-13-48	19.08	10.2	1.87059	—	—	—	—	—	56.6	0.96
HYQ-D-13-49	13.73	6.67	2.05847	—	—	—	—	—	49.5	0.84
HYQ-D-13-50	15.69	7.84	2.00128	—	—	—	—	—	47	0.88
HYQ-D-13-51	19.08	10.07	1.89474	—	—	—	—	—	53.2	0.7
HYQ-D-13-52	13.33	9.41	1.41658	—	—	—	—	—	53.6	0.43
HYQ-D-13-53	12.16	7.97	1.52572	—	—	—	—	—	65.6	0.67
HYQ-D-13-54	15.95	8.1	1.96914	—	—	—	—	—	52.4	0.92
HYQ-D-13-55	12.29	7.45	1.64966	—	—	—	—	—	57.2	0.68
HYQ-D-13-56	11.63	5.88	1.97789	—	—	—	—	—	54.3	0.89
HYQ-D-13-57	17.65	9.54	1.8501	—	—	—	—	—	51.8	0.68
HYQ-D-13-58	13.73	8.76	1.56735	—	—	—	—	—	55.2	0.52
HYQ-D-13-59	20.78	10.2	2.03725	—	—	—	—	—	51	0.82
HYQ-D-13-60	15.56	7.84	1.98469	—	—	—	—	—	44.1	0.63
HYQ-D-13-61	12.42	6.41	1.9376	—	—	—	—	—	48.3	0.76
HYQ-D-13-62	12.68	—	—	—	—	—	—	—	—	—
HYQ-D-13-63	13.2	7.71	1.71206	—	—	—	—	—	53.7	0.69
HYQ-D-13-64	12.29	6.14	2.00163	—	—	—	—	—	53	0.88
HYQ-D-13-65	15.29	5.1	2.99804	—	—	—	—	—	30	0.95
HYQ-D-13-66	10.33	—	—	—	—	—	—	—	—	—
HYQ-D-13-67	19.35	11.5	1.68261	—	—	—	—	—	46.5	0.5
HYQ-D-13-68	15.29	7.84	1.95026	—	—	—	—	—	50.5	0.8
HYQ-D-13-69	13.86	7.32	1.89344	—	—	—	—	—	53.2	0.88
HYQ-D-13-70	16.86	10.98	1.53552	—	—	—	—	—	56.5	0.58
HYQ-D-13-71	10.98	6.41	1.71295	—	—	—	—	—	61.9	0.86
HYQ-D-13-72	14.64	7.58	1.9314	—	—	—	—	—	57.4	0.81
HYQ-D-13-73	12.55	10.72	1.17071	—	—	—	—	—	—	—
HYQ-D-13-74	14.64	10.07	1.45382	—	—	—	—	—	59.8	0.58
HYQ-D-13-75	13.99	8.63	1.62109	—	—	—	—	—	57.3	0.61
HYQ-D-13-76	15.95	7.84	2.03444	—	—	—	—	—	42.8	0.65
HYQ-D-13-77	12.42	8.24	1.50728	—	—	—	—	—	63	0.62
HYQ-D-13-78	13.73	8.76	1.56735	—	—	—	—	—	64.3	0.75
HYQ-D-13-79	17.25	9.15	1.88525	—	—	—	—	—	36.6	0.34
HYQ-D-13-80	11.9	6.93	1.71717	—	—	—	—	—	59.4	0.58
HYQ-D-13-81	11.37	7.84	1.45026	—	—	—	—	—	75	0.67
HYQ-D-16	>18.4	—	—	—	—	—	23.2	24	47.2	—
HYQ-E-6	8.14	5.61	1.45098	—	—	—	—	—	66	0.68
HYQ-E-7-1	15.54	9.41	1.65143	—	—	—	—	—	57.6	0.53
HYQ-E-7-2	11.93	8.7	1.37126	—	—	—	—	—	75.6	0.46
HYQ-E-8-1	11.74	6.67	1.76012	—	—	—	—	47	—	0.61
HYQ-E-8-2	12.49	8.45	1.47811	—	—	—	—	60	—	0.73
HYQ-E-9	10.94	5.94	1.84175	—	—	—	—	—	43	0.97
HYQ-E-10-1	11.77	—	—	—	—	—	—	—	48.6	—
HYQ-E-10-2	>14.4	9.52	—	—	—	—	—	—	51	—
HYQ-E-10-3	10.02	8.31	1.20578	—	—	—	—	—	65.5	0.46
HYQ-E-10-4	>14.7	8.57	—	—	—	—	—	—	66.6	—
HYQ-E-11	7.7	6.2	1.24194	—	—	—	—	—	70	0.5
HYQ-F-1-1	29.22	20.02	1.45954	—	—	—	25.3	31.8	57.1	0.33
HYQ-F-1-2	16.21	9.17	1.76772	—	—	—	—	—	51	0.7
HYQ-F-2	15.45	11.02	1.402	—	—	—	32.5	30.9	63.4	0.6
HYQ-F-3	18.58	10.88	1.70772	—	—	—	23.6	28	51.6	0.74
HYQ-F-4	15.73	11.88	1.32407	—	—	—	—	—	63.2	0.47
HYQ-F-5	15.18	—	—	—	—	—	19.8	28.7	48.5	—
HYQ-F-6	18.35	11.1	1.65315	—	—	—	25.8	25.2	51	0.56
HYQ-F-7	17.27	9.57	1.8046	—	—	—	—	—	48.3	0.7
HYQ-F-8	17.09	13.72	1.24563	—	—	—	—	—	67.2	0.47
HYQ-F-9	19.47	10.86	1.79282	—	—	—	20.2	22.4	42.6	0.61
HYQ-F-10	17.29	10.62	1.62806	—	—	—	28.9	18.7	47.6	0.76
HYQ-F-11	14.73	13.43	1.0968	—	—	—	—	—	75	0.41
HYQ-F-12-1	24.43	18.14	1.34675	—	—	—	—	57.5	—	0.43
HYQ-F-12-2	16.47	10.54	1.56262	—	—	—	—	—	50.1	0.53
HYQ-F-13	16.58	10.92	1.51832	—	—	—	27.7	31.2	58.9	0.58
HYQ-F-14	15.85	9.84	1.61077	—	—	—	—	—	51.6	0.55
HYQ-F-15	14.96	12.5	1.1968	—	—	—	—	—	66.5	0.5
HYQ-F-16	14.96	7.46	2.00536	—	—	—	—	—	40.7	0.57
HYQ-F-17	14.88	9.19	1.61915	—	—	—	—	—	44.2	0.37
HYQ-F-18-1	16.89	11.11	1.52025	—	—	—	29	27.2	56.2	0.61
HYQ-F-18-2	14.47	8.28	1.74758	—	—	—	31.4	18.6	51	0.55
HYQ-G-1	23.33	—	—	—	—	—	—	—	58.2	—
HYQ-H-1	12.96	7.92	1.63636	—	—	—	31.2	20	51.2	0.62
HYQ-H-2-1	12.51	4.3	2.9093	54	104.4	175	21	18	39	0.68
HYQ-H-2-2	13.85	8.85	1.56497	50.5	—	—	—	—	56.5	0.64
HYQ-H-2-3	11.28	7.86	1.43511	—	—	—	—	—	62.4	0.53
HYQ-H-2-4	10.17	5.61	1.81283	—	—	—	—	—	48	0.63
HYQ-H-3	26.13	14.18	1.84274	—	—	—	20.4	24.7	45.1	0.51
HYQ-H-4-1	14.53	7.67	1.89439	74.2	—	—	—	—	45.4	0.85
HYQ-H-4-2	12.78	7.45	1.71544	—	—	—	—	—	41.8	0.53
HYQ-H-4-3	12.37	6.82	1.81378	—	—	—	—	—	56.8	0.82
HYQ-I-1	16.93	11.18	1.51431	—	—	—	29.6	31.6	61.2	0.65
HYQ-I-2-1	18.02	—	—	—	—	—	—	54.7	—	—
HYQ-I-2-2	15.13	10.14	1.49211	—	—	—	—	62.3	—	0.68
HYQ-I-3	15.16	8.95	1.69385	—	—	—	27.9	19.3	47.2	0.64
HYQ-J-1	14.36	8.08	1.77723	—	—	—	24.7	20.2	44.9	0.54
HYQ-J-10-6	14.23	6.95	2.04748	—	—	—	—	—	39	0.73
HYQ-J-10-7	13.2	8.84	1.49321	—	—	—	25	25.1	50.1	0.56
HYQ-K-1	13.09	9.8	1.33571	—	—	—	33	29.4	62.4	0.43
HYQ-K-2	11.74	7.66	1.53264	—	—	—	—	—	47	0.37
HYQ-13	12.7	6.4	1.98437	—	—	—	14.4	22.9	37.3	0.22
HYQ-21	10.84	>7.2	—	—	—	—	—	—	51.9	0.48
HYQ-29	29.2	19.4	1.5	—	—	—	—	—	56	0.65
HYQ-30-1	31.5	24.2	1.30165	98	—	—	—	—	61	0.46
HYQ-30-2	30	23	1.3	—	—	—	—		59	0.47
HYQ-31-1	30	23.5	1.3	100	—	—	—	—	65	0.58
HYQ-31-2	—	—	—	—	—	—	—	—	—	—
YLSNHM00977	7.3	4.3	1.69767	—	—	—	23.7	25.8	49.5	0.45
YLSNHM00978	>11.6	—	—	—	—	—	23.6	31.6	55.2	—
YLSNHM00979	13.2	8.7	1.51724	—	—	—	—	—	45.8	0.34
YLSNHM00980	10	7.1	1.40845	—	—	—	23.9	28.1	52	0.37
YLSNHM01223	24.9	13.6	1.83088	—	—	—	17.7	26.8	44.5	0.53
YLSNHM01225	>13.7	9.5	—	—	—	—	—	—	—	0.38
YLSNHM01226	19.7	12.6	1.56349	—	—	—	25.8	24.2	50	0.52
YLSNHM01236-1	—	7.8	—	—	—	—	—	—	48.2	—
YLSNHM01236-2	—	6.5	—	—	—	—	—	—	42.4	—
YLSNHM01236-4	—	6.9	—	—	—	—	—	—	—	—
YLSNHM01237-1	15.7	10.7	1.46729	—	—	—	27.4	27.8	55.2	0.51
YLSNHM01237-2	>9.8	—	—	—	—	—	—	—	71.6	—
YLSNHM01243-1	13.4	8.8	1.52273	—	—	—	29.8	24.7	54.5	0.55
YLSNHM01243-2	14.8	—	—	—	—	—	—	—	54	—
YLSNHM01244	11.43	8.68	1.31682	—	—	—	—	—	67.2	0.6
YLSNHM01246	13.05	8.68	1.50346	—	—	—	—	—	52.5	0.57
YLSNHM01247-1	9.7	8.4	1.15476	—	—	—	—	—	63.8	0.37
YLSNHM01247-2	12	8.4	1.42857	—	—	—	—	—	54	0.36
YLSNHM01250	7.7	5.9	1.30508	—	—	—	28.5	26.4	54.9	0.35
YLSNHM01265	25.2	24	1.05	—	—	—	—	—	57	0.14
YLSNHM01268	12.6	8.1	1.55556	—	—	—	26.5	22.6	49.1	0.52
YLSNHM01269	>12.9	8.6	—	—	—	—	31	23	54	0.59
YLSNHM01270	>6.9	5.4	—	—	—	—	31.8	33	64.8	0.61
YLSNHM01271	13	7.3	1.78082	—	—	—	29.3	17.8	57.1	0.6
YLSNHM01272	8.4	5.9	1.42373	—	—	—	29	26	55	0.48
YLSNHM01273	12.4	>8.0	—	—	—	—	—	—	56	—
YLSNHM01274-1	>9.1	>6.8	—	—	—	—	24.1	24.2	48.3	—
YLSNHM01274-2	>6.6	>6.3	—	—	—	—	—	—	49	—
YLSNHM01275	>14.5	9.5	—	—	—	—	—	—	—	—
YLSNHM01276	>10.1	5.6	—	—	—	—	21.6	16.7	38.3	0.76
YLSNHM01277	10.1	5.6	1.80357	—	—	—	22.4	24.4	46.8	0.69
YLSNHM01278	9.5	5.9	1.61017	—	—	—	24.7	25.3	50	0.67
YLSNHM01279	14.2	8.9	1.59551	—	—	—	28.6	24.3	52.9	0.42
YLSNHM01280	>14.6	8.2	—	—	—	—	20.8	21.7	42.5	0.46
As-TI1	18.08	—	—	—	—	—	—	—	—	—
As-TI2	23.37	—	—	—	—	—	—	—	—	—
As-TI3	16.24	—	—	—	—	—	—	—	—	—

## Sheet: bird
Specimen number	ML	MW	ML/MW	PL	SL	PA	II-III	III-IV	II-IV	M			Abbreviations
HYQ-D-1-1	4.04	4.6	0.878261	—	—	—	—	—	100	0.46			ML	maximum length
HYQ-E-1-1	4.56	5.25	0.868571	—	—	—	—	—	94.1	0.42			MW	maximum width
HYQ-E-1-2	4.58	5.35	0.856075	—	—	—	—	—	108	0.49			ML/MW	dimensionless
HYQ-E-1-3	4.78	5.9	0.810169	—	—	—	—	—	97.3	0.34			PL	pace length
HYQ-E-1-4	4.75	6.23	0.76244	—	—	—	—	—	111.8	0.45			SL	stride length
HYQ-E-1-5	4.86	5.2	0.934615	—	—	—	—	—	99	0.5			PA	pace angulation
HYQ-E-1-6	5.42	5.49	0.98725	—	—	—	—	—	93.5	0.46			II-III	the divarication angle between digits II and III
HYQ-E-1-7	4.8	5.34	0.898876	—	—	—	—	—	120	0.47			III-IV	the divarication angle between digits III and IV
HYQ-E-1-8	5.05	5.93	0.851602	—	—	—	—	—	103.4	0.48			II-IV	the divarication angle between digits II and IV
HYQ-E-1-9	4.98	5.14	0.968872	—	—	—	—	—	84	0.45			M	Mesaxony
HYQ-E-2-1	4.35	6.09	0.714286	—	—	—	65	42	106.5	0.32
HYQ-E-2-2	4.56	5.32	0.857143	—	—	—	59	42	101	0.43
HYQ-E-3-1	5.05	6.83	0.739385	—	—	—	50	58	108	0.44
HYQ-E-3-2	4.07	3.56	1.14326	—	—	—	42	—	76	0.55
HYQ-E-3-3	3.81	5.3	0.718868	—	—	—	—	—	128	0.44
HYQ-J-5-1	5.11	4.95	1.03232	—	—	—	—	—	87.6	0.51
HYQ-J-9-1	2.84	3.58	0.793296	—	—	—	—	—	102	0.38
HYQ-J-9-2	3.28	2.85	1.15088	—	—	—	—	—	83.2	0.7
HYQ-J-9-3	3.18	3.4	0.935294	—	—	—	—	—	89.7	0.45
HYQ-J-9-4	3.34	3.11	1.07395	6.4	12.6	155	—	—	70	0.45
HYQ-J-9-5	3.23	2.6	1.24231	6.5	13	166	—	—	68	0.6
HYQ-J-9-6	3.65	3.14	1.16242	6.6	—	—	—	—	82	0.57
HYQ-J-9-7	3.53	3.05	1.15738	—	—	—	—	—	72.4	0.45
HYQ-J-10-1	3.61	3.33	1.08408	5	14.2	180	—	—	96.9	0.53
HYQ-J-10-2	3.67	3.76	0.976064	9.2	16.1	110	—	—	84.2	0.41
HYQ-J-10-3	3.72	3.52	1.05682	10.4	15.3	160	—	—	86	0.47
HYQ-J-10-4	3.73	4	0.9325	5.1	—	—	—	—	92.9	0.36
HYQ-J-10-5	4.2	3.55	1.1831	—	—	—	—	—	75.6	0.56
HYQ-K-3-1	3.97	3.44	1.15407	—	—	—	—	—	75.2	0.53
HYQ-K-3-2	2.96	3.48	0.850575	—	—	—	—	—	99.6	0.49
HYQ-K-3-3	3.48	3.2	1.0875	—	—	—	—	—	84	0.53
HYQ-7-10	5.63	6.08	0.925987	—	—	—	—	—	96.4	0.59
HYQ-7-11	4.56	4.56	1	—	—	—	—	—	85.5	0.54
HYQ-7-7	5.38	5.44	0.988971	—	—	—	—	—	98.3	0.51
HYQ-7-8	3.1	3.8	0.815789	—	—	—	—	—	114.7	0.42
HYQ-7-9	4.37	4.49	0.973274	—	—	—	—	—	93.4	0.52
HYQ-9-1	3.49	5.03	0.693837	—	—	—	—	—	126	0.42
HYQ-9-2	5.24	5.36	0.977612	—	—	—	—	—	91.9	0.51
HYQ-9-3	4.2	4.94	0.850202	—	—	—	—	—	109.1	0.43
HYQ-9-4	4.74	5.19	0.913295	—	—	—	—	—	91.6	0.44
HYQ-9-5	4.24	4.9	0.865306	—	—	—	—	—	93.9	0.45
HYQ-9-6	5.53	5.11	1.08219	—	—	—	—	—	91.4	0.59
HYQ-9-7	5.03	5.69	0.884007	—	—	—	—	—	97.7	0.47
HYQ-11-1	5.05	7.1	0.711268	—	—	—	—	—	129	0.45
HYQ-11-2	4.31	5.15	0.836893	—	—	—	—	—	126.9	0.61
HYQ-11-3	4.94	6.34	0.77918	—	—	—	—	—	97.5	0.33
HYQ-11-4	4.52	6.3	0.71746	—	—	—	—	—	139.6	0.5
HYQ-11-5	4.44	5.41	0.820702	—	—	—	—	—	122	0.57
HYQ-11-6	6.42	7.06	0.909348	—	—	—	—	—	111.9	0.53
HYQ-11-7	4.86	4.9	0.991837	—	—	—	—	—	79.5	0.38
HYQ-12-1	4.1	3.89	1.05398	14.5	28.2	—	—	—	77.4	0.47
HYQ-12-2	4.06	3.89	1.0437	13.7	—	—	—	—	87.2	0.57
HYQ-12-3	4.1	3.72	1.10215	—	—	—	—	—	89.2	0.6
HYQ-12-4	4.1	4.77	0.859539	—	—	—	—	—	113.3	0.56
HYQ-12-5	5.75	5.66	1.0159	—	—	—	—	—	91.8	0.54
HYQ-12-6	5.2	5.49	0.947177	—	—	—	—	—	88	0.43
HYQ-12-7	3.76	5.75	0.653913	—	—	—	—	—	108.1	0.19
HYQ-12-8	4.18	5.11	0.818004	—	—	—	—	—	112.6	0.45
HYQ-12-9	3.34	4.73	0.706131	—	—	—	—	—	109	0.32
HYQ-12-10	4.73	5.11	0.925636	—	—	—	—	—	90	0.42
HYQ-12-11	4.77	4.82	0.989627	—	—	—	—	—	126.2	0.67
HYQ-12-12	4.31	5.28	0.816288	—	—	—	—	—	127.9	0.55
HYQ-12-13	4.52	4.82	0.937759	—	—	—	—	—	85	0.4
HYQ-12-14	3.89	4.27	0.911007	—	—	—	—	—	96.7	0.51
HYQ-12-15	3.89	5.15	0.75534	—	—	—	—	—	89.5	0.27
HYQ-12-16	4.65	5.11	0.90998	—	—	—	—	—	95.4	0.4
HYQ-14	4.65	4.65	1	—	—	—	—	—	82.2	0.46
HYQ-15-1	4.24	6.15	0.689431	—	—	—	—	—	115.6	0.36
HYQ-15-2	4.53	4.62	0.980519	—	—	—	—	—	89.9	0.39
HYQ-15-3	3.61	2.91	1.24055	—	—	—	—	—	83.3	0.63
HYQ-16-1	3.12	3.61	0.864266	—	—	—	—	—	114.5	0.48
HYQ-16-2	3.41	3.28	1.03963	—	—	—	—	—	104.6	0.52
HYQ-16-3	3.86	3.28	1.17683	—	—	—	—	—	79.3	0.54
HYQ-17-1	4.78	3.41	1.40176	—	—	—	—	—	71.5	0.67
HYQ-17-2	3.32	3.32	1	—	—	—	—	—	99.1	0.59
HYQ-18-1	3.91	3.93	0.994911	—	—	—	—	—	85.7	0.51
HYQ-18-2	3.72	4.18	0.889952	—	—	—	—	—	100	0.56
HYQ-18-3	3.59	3.17	1.13249	—	—	—	—	—	85.2	0.61
HYQ-18-4	4.99	4.23	1.17967	—	—	—	—	—	82.4	0.58
HYQ-18-5	4.69	5.2	0.901923	—	—	—	—	—	105	0.56
HYQ-18-6	4.27	2.96	1.44257	—	—	—	—	—	59	0.54
HYQ-18-7	4.01	4.27	0.93911	—	—	—	—	—	88.4	0.4
HYQ-18-8	3.55	5.28	0.672348	—	—	—	—	—	130	0.41
HYQ-18-9	4.65	4.56	1.01974	—	—	—	—	—	90	0.51
HYQ-18-10	3.34	4.1	0.814634	—	—	—	—	—	106	0.44
HYQ-18-11	3.93	4.31	0.911833	—	—	—	—	—	87.3	0.34
HYQ-19-1	4.86	5.15	0.943689	—	—	—	—	—	103.9	0.48
HYQ-19-2	4.53	5.86	0.773038	—	—	—	—	—	106.6	0.42
HYQ-19-3	5.32	4.4	1.20909	—	—	—	—	—	87	0.59
HYQ-19-4	4.74	5.36	0.884328	—	—	—	—	—	97.9	0.42
HYQ-19-5	3.74	4.99	0.749499	—	—	—	—	—	95	0.35
HYQ-19-6	4.36	5.28	0.825758	—	—	—	—	—	92.2	0.39
YLSNHM01201-1	4.68	6.15	0.760976	21.5	39.7	180	—	—	98.9	0.33
YLSNHM01201-2	5.28	5.88	0.897959	18.3	—	—	—	—	99.2	0.46
YLSNHM01201-3	4.81	6.11	0.787234	—	—	—	—	—	104.7	0.44
YLSNHM01201-4	4.7	5.68	0.827465	17.6	35	160	47	42	88.5	0.36
YLSNHM01201-5	4.88	5.6	0.871429	18	—	—	44	55	98.8	0.44
YLSNHM01201-6	5.4	5.5	0.981818	—	—	—	43	46	89	0.47
YLSNHM01201-7	4.14	5.55	0.745946	18.8	36.6	155	—	—	103	0.37
YLSNHM01201-8	5.41	5.41	1	18.7	—	—	—	—	83.6	0.46
YLSNHM01201-9	4.61	5.41	0.852126	—	—	—	—	—	93.1	0.4
YLSNHM01201-10	5.35	6.35	0.84252	15.9	30.1	167	—	—	89.5	0.43
YLSNHM01201-11	5.61	6.08	0.922697	14.4	—	—	—	—	92.2	0.52
YLSNHM01201-12	5.68	5.01	1.13373	—	—	—	—	—	89.6	0.56
YLSNHM01201-13	4.61	5.61	0.821747	—	—	—	—	—	100.4	0.45
YLSNHM01201-14	4.61	5.08	0.90748	—	—	—	—	—	88.4	0.41
YLSNHM01201-15	4.94	5.61	0.88057	—	—	—	—	—	122.8	0.58
YLSNHM01201-16	5.41	6.28	0.861465	—	—	—	—	—	110.4	0.52
YLSNHM01201-17	5.48	5.61	0.976827	—	—	—	—	—	104.1	0.59
YLSNHM01203-1	4.2	4.6	0.913043	—	—	—	—	—	85.5	0.3
YLSNHM01203-2	4.2	5.6	0.75	—	—	—	—	—	102.2	0.32
YLSNHM01203-3	4.6	3.7	1.24324	—	—	—	—	—	70	0.43
YLSNHM01203-4	4	5.2	0.769231	—	—	—	—	—	110	0.4
YLSNHM01203-5	3.7	5	0.74	—	—	—	—	—	96.4	0.26
YLSNHM01203-6	4.5	5	0.9	—	—	—	—	—	106.6	0.5
YLSNHM01203-7	4.9	4.9	1	—	—	—	—	—	94	0.53
YLSNHM01210-1	3.9	5.8	0.672414	—	—	—	—	—	107.4	0.29
YLSNHM01210-2	4	4.5	0.888889	—	—	—	—	—	82	0.27
YLSNHM01210-3	5.3	6.6	0.80303	—	—	—	—	—	114.5	0.48
YLSNHM01210-4	4.6	5.9	0.779661	—	—	—	—	—	101.7	0.36
YLSNHM01210-5	4.6	5	0.92	—	—	—	—	—	94	0.44
YLSNHM01210-6	5.3	4.9	1.08163	—	—	—	—	—	84.4	0.55
YLSNHM01210-7	4.4	5.8	0.758621	—	—	—	—	—	114	0.43
YLSNHM01210-8	4.4	5.3	0.830189	—	—	—	—	—	93	0.34
YLSNHM01210-9	4.1	5.3	0.773585	—	—	—	—	—	97.7	0.42
YLSNHM01210-10	4.6	4.4	1.04545	—	—	—	—	—	94.4	0.59
YLSNHM01210-11	3.4	3.8	0.894737	—	—	—	—	—	100	0.47
YLSNHM01212-1	3.4	4.3	0.790698	—	—	—	—	—	104	0.41
YLSNHM01212-2	3.6	2.4	1.5	—	—	—	—	—	59.7	0.58
YLSNHM01212-3	3.6	5.3	0.679245	—	—	—	—	—	108.6	0.32
YLSNHM01212-4	3.1	2.8	1.10714	—	—	—	—	—	104	0.68
YLSNHM01212-5	3.7	5.2	0.711538	—	—	—	—	—	124	0.44
YLSNHM01212-6	3.3	3.7	0.891892	—	—	—	—	—	100	0.46
YLSNHM01212-7	4.9	4.4	1.11364	—	—	—	—	—	90.8	0.66
YLSNHM01212-8	3.8	3.9	0.974359	—	—	—	—	—	100	0.59
YLSNHM01212-9	3.8	4.5	0.844444	—	—	—	—	—	112	0.49
YLSNHM01212-10	3.9	4.6	0.847826	—	—	—	—	—	109	0.48
YLSNHM01213-1	2.5	3.4	0.735294	—	—	—	—	—	118.3	0.47
YLSNHM01213-2	4.2	4.8	0.875	—	—	—	—	—	88.5	0.38
YLSNHM01213-3	3.7	3.8	0.973684	—	—	—	—	—	95	0.47
YLSNHM01213-4	4.1	5.6	0.732143	—	—	—	—	—	103	0.32
YLSNHM01213-5	3.8	4	0.95	—	—	—	—	—	87.6	0.5
YLSNHM01214-1	3.4	3.1	1.09677	—	—	—	—	—	78.1	0.52
YLSNHM01214-2	3.1	4	0.775	—	—	—	—	—	98.3	0.38
YLSNHM01214-3	4.3	4.2	1.02381	—	—	—	—	—	91	0.6
YLSNHM01214-4	3.8	5.1	0.745098	—	—	—	—	—	103.5	0.35
YLSNHM01214-5	3.8	4.2	0.904762	—	—	—	—	—	101.2	0.34
YLSNHM01214-6	3.4	4	0.85	—	—	—	—	—	102.8	0.48
YLSNHM01214-7	4.3	4.6	0.934783	—	—	—	—	—	118	0.61
YLSNHM01214-8	4.7	5.9	0.79661	—	—	—	—	—	114.7	0.47
YLSNHM01214-9	4.1	5.4	0.759259	—	—	—	—	—	107.4	0.41
YLSNHM01214-10	2.9	4.6	0.630435	—	—	—	—	—	111.4	0.28
YLSNHM01215-1	4.4	4.9	0.897959	—	—	—	—	—	100	0.49
YLSNHM01215-2	4	5.3	0.754717	—	—	—	—	—	124.2	0.53
YLSNHM01216-1	3	4.1	0.731707	—	—	—	—	—	110.3	0.39
YLSNHM01216-2	4.7	5	0.94	—	—	—	—	—	110.7	0.58
YLSNHM01216-3	3.8	5.2	0.730769	—	—	—	—	—	96	0.27
YLSNHM01216-4	4.8	6	0.8	—	—	—	—	—	107.8	0.46
YLSNHM01216-5	5	3.5	1.42857	—	—	—	—	—	66.8	0.55
YLSNHM01216-6	4.4	5.4	0.814815	—	—	—	—	—	98	0.4
YLSNHM01216-7	4.3	5.6	0.767857	—	—	—	—	—	97.8	0.35
YLSNHM01216-8	4.6	5.7	0.807018	—	—	—	—	—	103.7	0.44
YLSNHM01217-1	5	5.5	0.909091	14.6	29.8	164	42	52	94	0.47
YLSNHM01217-2	5	5.1	0.980392	15.5	—	—	46	38	84.5	0.43
YLSNHM01217-3	4.9	—	—	—	—	—	—	—	—	—
YLSNHM01217-4	3.5	4.5	0.777778	—	—	—	—	—	103.9	—
YLSNHM01217-5	4	4.1	0.97561	—	—	—	—	—	89.3	0.46
YLSNHM01217-6	4.5	3.1	1.45161	—	—	—	—	—	69	0.42
YLSNHM01217-7	3.7	3.5	1.05714	—	—	—	—	—	72.2	0.42
YLSNHM01217-8	4.6	4.7	0.978723	—	—	—	—	—	100	0.62
YLSNHM01227-1	4.4	6.1	0.721311	—	—	—	—	—	116.8	0.41
YLSNHM01227-2	5.1	—	—	—	—	—	—	—	—	—
YLSNHM01227-3	3.8	5.5	0.690909	—	—	—	—	—	119.6	0.36
YLSNHM01227-4	4.3	5.4	0.796296	—	—	—	—	—	112	0.46
YLSNHM01230-1	4.3	5.3	0.811321	—	—	—	—	—	120	0.47
YLSNHM01230-2	3.3	5.5	0.6	—	—	—	—	—	124	0.33
YLSNHM01230-3	4	4.8	0.833333	—	—	—	—	—	115.9	0.49
YLSNHM01231-1	4.5	5.8	0.775862	—	—	—	—	—	113	0.44
YLSNHM01231-2	4.6	6	0.766667	—	—	—	—	—	114	0.43
YLSNHM01232-1	4.5	5.6	0.803571	—	—	—	—	—	106.2	0.45
YLSNHM01232-2	5.1	6	0.85	—	—	—	—	—	100.2	0.49
YLSNHM01232-3	4.8	5	0.96	—	—	—	—	—	90.4	0.46
YLSNHM01232-4	4.9	5.1	0.960784	—	—	—	—	—	111.7	0.48
YLSNHM01232-5	3.8	4.7	0.808511	—	—	—	—	—	114	0.45
YLSNHM01232-6	4	3.8	1.05263	—	—	—	—	—	91.4	0.5
YLSNHM01232-7	3.3	2.9	1.13793	—	—	—	—	—	78.2	0.55
YLSNHM01232-8	5.8	6.2	0.935484	—	—	—	—	—	106.8	0.56
YLSNHM01234-1	3.9	3.4	1.14706	—	—	—	—	—	82.4	0.62
YLSNHM01234-2	3.2	3.8	0.842105	—	—	—	—	—	112.7	0.53
YLSNHM01234-3	3.2	5.4	0.592593	—	—	—	—	—	138.2	0.35
YLSNHM01238	2.9	3.9	0.74359	—	—	—	—	—	102	0.44
YLSNHM01241-1	3.02	3.9	0.774359	—	—	—	—	—	96.3	0.34
YLSNHM01241-2	3.61	4.15	0.86988	—	—	—	—	—	101.5	0.42
YLSNHM01241-3	3.8	3.85	0.987013	—	—	—	—	—	104.9	0.62
YLSNHM01241-4	4.05	4.34	0.93318	—	—	—	—	—	102.6	0.53
YLSNHM01241-5	4.63	4	1.1575	—	—	—	—	—	94.5	0.75
YLSNHM01241-6	3.66	3.95	0.926582	—	—	—	—	—	82.4	0.41
YLSNHM01241-7	3.66	3.95	0.926582	—	—	—	—	—	104.3	0.32
YLSNHM01241-8	3.66	3.46	1.0578	—	—	—	—	—	113.9	0.62
YLSNHM01241-9	3.9	3.76	1.03723	—	—	—	—	—	107.9	0.47
YLSNHM01241-10	3.66	3.76	0.973404	—	—	—	—	—	78.4	0.35
YLSNHM01241-11	2.78	3.37	0.824926	—	—	—	—	—	100.2	0.45
YLSNHM01241-12	4.1	4.29	0.955711	—	—	—	—	—	101.6	0.57
YLSNHM01241-13	3.9	3.41	1.1437	—	—	—	—	—	77.1	0.57
YLSNHM01241-14	4.49	6.2	0.724194	—	—	—	—	—	110.6	0.43
YLSNHM01241-15	4.63	4.2	1.10238	—	—	—	—	—	86.2	0.5
YLSNHM01241-16	4.39	3.9	1.12564	—	—	—	—	—	86.6	0.59
YLSNHM01241-17	3.61	4.78	0.75523	—	—	—	—	—	108.1	0.32
YLSNHM01241-18	4.1	4.15	0.987952	—	—	—	—	—	116.5	0.62
YLSNHM01241-19	1.51	2.15	0.702326	—	—	—	—	—	103.5	0.34
YLSNHM01241-20	3.71	5.02	0.739044	—	—	—	—	—	116	0.4
YLSNHM01241-21	4.05	4.49	0.902004	—	—	—	—	—	100.7	0.48
YLSNHM01241-22	3.46	4.59	0.753813	—	—	—	—	—	118.2	0.45
YLSNHM01241-23	2.49	3.66	0.680328	—	—	—	—	—	117	0.36
YLSNHM01242-1	4.06	4	1.015	13.9	28.4	—	—	—	87.1	0.45
YLSNHM01242-2	3.55	4	0.8875	14.5	27.8	—	—	—	101.9	0.52
YLSNHM01242-3	3.55	4	0.8875	13.7	27.2	166	—	—	103.7	0.45
YLSNHM01242-4	3.81	3.68	1.03533	13.7	—	—	—	—	90.2	0.54
YLSNHM01242-5	>2.7	—	—	—	—	—	—	—	—	—
YLSNHM01242-6	4.65	5.1	0.911765	8	16	167	—	—	112.3	0.49
YLSNHM01242-7	4.52	5.16	0.875969	8.1	—	—	—	—	108.3	0.46
YLSNHM01242-8	4.39	4.97	0.8833	—	—	—	—	—	95.5	0.42
YLSNHM01242-9	3.94	—	—	—	—	—	—	—	—	—
YLSNHM01242-10	3.74	4.45	0.840449	—	—	—	—	—	91.2	0.32
YLSNHM01242-11	3.87	5.16	0.75	—	—	—	—	—	100	0.33
YLSNHM01242-12	4.32	4.71	0.917197	—	—	—	—	—	97.1	0.52
YLSNHM01242-13	5.23	5.35	0.97757	—	—	—	—	—	95.4	0.42
YLSNHM01242-14	4.26	5.16	0.825581	—	—	—	—	—	101	0.45
YLSNHM01242-15	4.45	5.29	0.84121	—	—	—	—	—	104.2	0.41
YLSNHM01242-16	4.32	4.71	0.917197	—	—	—	—	—	84.8	0.38
YLSNHM01242-17	4.32	5.1	0.847059	—	—	—	—	—	104.3	0.39
YLSNHM01242-18	5.42	4.52	1.19912	—	—	—	—	—	81	0.56
YLSNHM01242-19	4.71	4.39	1.07289	—	—	—	—	—	76.9	0.46
YLSNHM01242-20	4.58	4.52	1.01327	—	—	—	—	—	97	0.59
YLSNHM01245-1	5.1	6	0.85	—	—	—	—	—	112.4	0.48
YLSNHM01247-3	4.9	4.5	1.08889	—	—	—	—	—	113.4	0.71
YLSNHM01248-1	4.4	5.6	0.785714	—	—	—	—	—	102	0.39
YLSNHM01248-2	4.4	6.8	0.647059	—	—	—	—	—	136	0.46
YLSNHM01248-3	3.1	3	1.03333	—	—	—	—	—	93.7	0.57
YLSNHM01248-4	4	5.6	0.714286	—	—	—	—	—	122.6	0.43
YLSNHM01248-5	5.1	6	0.85	—	—	—	—	—	140.8	0.62
YLSNHM01248-7	6.3	6.8	0.926471	—	—	—	—	—	109	0.53
YLSNHM01251-1	3.6	4.1	0.878049	—	—	—	—	—	94	0.35
YLSNHM01251-2	3.7	3.6	1.02778	—	—	—	—	—	89.5	0.52
YLSNHM01251-3	4.8	5.1	0.941176	—	—	—	—	—	96.3	0.47
YLSNHM01251-4	4	3.6	1.11111	—	—	—	—	—	71.3	0.43
YLSNHM01251-5	3.8	5.9	0.644068	—	—	—	—	—	101	0.25
YLSNHM01251-6	4.5	4.7	0.957447	—	—	—	—	—	99.4	0.48
YLSNHM01251-7	4.5	5.4	0.833333	—	—	—	—	—	118.8	0.54
YLSNHM01253-1	3.95	4.82	0.819502	—	—	—	—	—	102.3	0.4
YLSNHM01253-2	3.53	3.37	1.04748	—	—	—	—	—	98	0.46
YLSNHM01253-3	4.28	4.49	0.953229	—	—	—	—	—	103.3	0.46
YLSNHM01254-1	5.3	5.7	0.929825	—	—	—	—	—	102	0.53
YLSNHM01254-2	2.7	3.3	0.818182	—	—	—	—	—	98	0.36
YLSNHM01254-3	5.2	5.7	0.912281	—	—	—	—	—	89	0.4
YLSNHM01254-4	4.3	3.5	1.22857	—	—	—	—	—	72	0.54
YLSNHM01254-5	5	5.5	0.909091	—	—	—	—	—	94.4	0.47
YLSNHM01255-1	5.8	5.5	1.05455	—	—	—	—	—	83	0.49
YLSNHM01255-2	5.1	4.5	1.13333	—	—	—	—	—	80	0.56
YLSNHM01281-1	4.6	4.7	0.978723	—	—	—	—	—	96	0.53
YLSNHM01281-2	3.4	3.8	0.894737	—	—	—	—	—	119	0.61
YLSNHM01282-1	4.86	6.08	0.799342	—	—	—	—	—	113.5	0.46
YLSNHM01282-2	4.73	6.3	0.750794	—	—	—	—	—	106.4	0.35
YLSNHM01282-3	3.68	5.15	0.714563	—	—	—	—	—	142.3	—
YLSNHM01282-4	4.18	5.03	0.831014	—	—	—	—	—	103.2	0.46
YLSNHM01282-5	4.48	6.17	0.726094	—	—	—	—	—	118.2	0.45
YLSNHM01282-6	4.56	5.87	0.776831	—	—	—	—	—	104.4	0.37
YLSNHM01282-7	4.86	—	—	—	—	—	—	—	—	—
YLSNHM01283	4.7	4.4	1.06818	—	—	—	—	—	99	0.66
YLSNHM01284-1	4	4.6	0.869565	—	—	—	—	—	120	0.53
YLSNHM01284-2	2.6	3.4	0.764706	—	—	—	—	—	113	0.41
YLSNHM01285	3.6	3.9	0.923077	—	—	—	—	—	95	0.46
YLSNHM01286	4.1	4.5	0.911111	—	—	—	—	—	93	0.41
YLSNHM01287-1	5.2	5.7	0.912281	—	—	—	—	—	97	0.45
YLSNHM01287-2	4.5	6.2	0.725806	—	—	—	—	—	131	0.47
YLSNHM01287-3	3.8	4	0.95	—	—	—	—	—	80	0.38
YLSNHM01287-4	3.6	3.2	1.125	—	—	—	—	—	111	0.75
YLSNHM01287-5	3.5	4.3	0.813953	—	—	—	—	—	103	0.42
YLSNHM01289-1	4.6	4	1.15	—	—	—	—	—	79	0.55
YLSNHM01289-2	3.9	3.6	1.08333	—	—	—	—	—	77	0.43
YLSNHM01289-3	5.1	4.4	1.15909	—	—	—	—	—	76	0.52
YLSNHM01290	4.5	4.6	0.978261	—	—	—	—	—	83	0.41
YLSNHM01291-1	4.6	5.5	0.836364	—	—	—	—	—	117	0.53
YLSNHM01291-2	4.4	5.3	0.830189	—	—	—	—	—	112	0.49
YLSNHM01291-3	4	5	0.8	—	—	—	—	—	95	0.32
YLSNHM01292	4.3	4.2	1.02381	—	—	—	—	—	96	0.56
YLSNHM01293-1	4.2	5	0.84	—	—	—	—	—	101	0.42
YLSNHM01293-2	4.1	4.2	0.97619	—	—	—	—	—	95	0.5
YLSNHM01294-1	5.2	5.3	0.981132	—	—	—	—	—	91	0.49
YLSNHM01294-2	4.7	5.3	0.886792	—	—	—	—	—	99	0.42
YLSNHM01294-3	3.6	3.8	0.947368	—	—	—	—	—	106	0.55
YLSNHM01295-1	4.9	5.6	0.875	—	—	—	—	—	99	0.45
YLSNHM01295-2	5.3	5.6	0.946429	—	—	—	—	—	91	0.46
YLSNHM01295-3	4.2	3.1	1.35484	—	—	—	—	—	87	0.71
YLSNHM01295-4	4.7	4.9	0.959184	—	—	—	—	—	88	0.43
YLSNHM01295-5	3.9	4.4	0.886364	—	—	—	—	—	111	0.5
YLSNHM01295-6	5.6	6.2	0.903226	—	—	—	—	—	102	0.5

## Sheet: stegosaur
Specimen number	ML	MW	ML/MW	M			Abbreviations
HYQ-D-14m	5.38	10	0.538	—			ML	maximum length
HYQ-D-14p	12.68	9.63	1.31672	—			MW	maximum width
HYQ-D-15m	14.49	21.16	0.684783	—			ML/MW	dimensionless
HYQ-32m	19.8	26.5	0.7	—			M	Mesaxony
YLSNHM01256	31.6	19.2	1.64583	0.21
YLSNHM01258	34.7	17.7	1.96045	0.2
YLSNHM01260	33	22	1.5	0.23
YLSNHM01263	>20.7	118.8	—	0.21

## Sheet: pterosaur
Specimen number	ML	MW	ML/MW	digit I	digit II	digit III	PL	SL	PA	I-III	M		Abbreviations
HYQ-A-1-1p	6.84	4.17	1.64029	—	—	—	—	—	—	—	—		ML	maximum length
HYQ-A-1-2m	5	2.3	2.17391	2.3	2.5	3.6	—	—	—	143.6	0.25		MW	maximum width
HYQ-A-2m	5.5	2.8	1.96429	2.4	3.1	4.4	—	—	—	118.5	0.24		ML/MW	dimensionless
HYQ-A-5-1m	6.6	2.8	2.35714	1.8	3.6	5.6	—	—	—	104	0.22		digit I	the length of digit I
HYQ-A-5-2m	5.1	4.1	1.2439	3.6	4.4	3.5	—	—	—	91.8	0.38		digit II	the length of digit II
HYQ-A-5-3m	4.6	2.5	1.84	2.3	3.8	4.7	—	—	—	82	0.27		digit III	the length of digit III
HYQ-A-7-1m	6.5	3.4	1.91176	2.7	3.5	5.5	—	—	—	83.3	0.18		PL	pace length
HYQ-A-7-2p	6.7	2.89	2.31834	—	—	—	—	—	—	—	—		SL	stride length
HYQ-A-7-3m	6.8	2.6	2.61538	1.8	3.4	5.9	—	—	—	123.5	0.25		PA	pace angulation
HYQ-A-7-4p	6.55	3.6	1.81944	—	—	—	—	—	—	—	—		I-III	the divarication angle between digits I and III
HYQ-A-8-1p	4.2	1.8	2.33333	—	—	—	—	—	—	—	—		M	Mesaxony
HYQ-A-8-2p	6	2.19	2.73973	—	—	—	—	—	—	—	—
HYQ-A-8-3p	6.06	2.66	2.2782	—	—	—	—	—	—	—	—
HYQ-A-8-4p	5.38	2.88	1.86806	—	—	—	—	—	—	—	—
HYQ-A-8-5m	4.5	2.3	1.95652	2.5	3.1	4.7	—	—	—	64.3	0.14
HYQ-A-8-6p	5.75	2.75	2.09091	—	—	—	—	—	—	—	—
HYQ-A-8-7m	7.9	2.9	2.72414	3.5	2.4	5	—	—	—	114.8	0.09
HYQ-A-8-8p	7.73	2.27	3.40529	—	—	—	—	—	—	—	—
HYQ-A-9-1m	6.8	2.8	2.42857	3	3.4	5.6	—	—	—	86.3	0.1
HYQ-A-9-2p	6.67	3.2	2.08437	—	—	—	—	—	—	—	—
HYQ-A-10-1m	6	3.1	1.93548	2.3	3.3	5.3	—	—	—	107.4	0.25
HYQ-A-10-2p	5.4	2.62	2.06107	—	—	—	—	—	—	—	—
HYQ-A-10-3p	5.56	2.65	2.09811	—	—	—	—	—	—	—	—
HYQ-A-12-1m	4.4	2.1	2.09524	2.2	2.3	3.3	—	—	—	108.4	0.17
HYQ-A-12-2p	>4.2	2.66	—	—	—	—	—	—	—	—	—
HYQ-A-12-3p	5.14	2.06	2.49515	—	—	—	—	—	—	—	—
HYQ-A-12-4p	5.36	2.28	2.35088	—	—	—	—	—	—	—	—
HYQ-A-12-5p	6.6	2.11	3.12796	—	—	—	—	—	—	—	—
HYQ-A-12-6m	6.6	2.2	3	2.8	2.2	4	—	—	—	144	0.19
HYQ-A-13-1p	6.81	3.31	2.0574	—	—	—	—	—	—	—	—
HYQ-A-13-10m	6.9	2.4	2.875	3.4	2.6	4.4	—	—	—	114	0.1
HYQ-A-13-11p	7.79	2.52	3.09127	—	—	—	—	—	—	—	—
HYQ-A-13-12m	7.4	3	2.46667	2.9	3.8	5.4	—	—	—	104	0.21
HYQ-A-13-2m	7.6	2.8	2.71429	3	3.3	5.3	—	—	—	104	0.2
HYQ-A-13-3m	6.4	3	2.13333	2.9	3.1	4	—	—	—	—	—
HYQ-A-13-4m	5.8	2.7	2.14815	2.6	2.8	3.4	—	—	—	132.9	0.27
HYQ-A-13-5p	>7.7	3.52	—	—	—	—	—	—	—	—	—
HYQ-A-13-6p	5.91	3.64	1.62363	—	—	—	—	—	—	—	—
HYQ-A-13-7p	7.75	3.23	2.39938	—	—	—	—	—	—	—	—
HYQ-A-13-8p	8.17	3.64	2.24451	—	—	—	—	—	—	—	—
HYQ-A-13-9p	>7.0	3	—	—	—	—	—	—	—	—	—
HYQ-A-14-1m	5.3	2.8	1.89286	3	3.6	5	—	—	—	91.5	0.17
HYQ-A-14-2m	5.2	2.5	2.08	2.3	3.1	5.1	—	—	—	95.7	0.18
HYQ-A-19-1p	9.2	2.6	3.53846	—	—	—	—	—	—	—	—
HYQ-A-19-2p	1.6	2.7	0.592593	—	—	—	—	—	—	—	—
HYQ-A-25-1p	7.58	3.51	2.15954	—	—	—	—	—	—	—	—
HYQ-A-25-2p	7.09	2.86	2.47902	—	—	—	—	—	—	—	—
HYQ-A-25-3m	6.6	2.5	2.64	2.2	3.2	5	—	—	—	70	0.22
HYQ-A-25-4m	7	2.8	2.5	2.8	3.5	5.7	—	—	—	95	0.18
HYQ-A-25-5p	6.38	3.35	1.90448	—	—	—	—	—	—	—	—
HYQ-A-25-6m	6.8	2.8	2.42857	2	4.3	6.5	—	—	—	97	0.17
HYQ-A-25-7m	7.2	2.5	2.88	2.3	2.6	5.1	—	—	—	113	0.14
HYQ-A-25-8p	7.99	3.26	2.45092	—	—	—	—	—	—	—	—
HYQ-A-25-9p	5.92	2.95	2.00678	—	—	—	—	—	—	—	—
HYQ-A-25-10m	6.1	2.8	2.17857	2.6	3	4.3	—	—	—	133	0.27
HYQ-A-26-1m	7.1	3.3	2.15152	2.7	3.5	5.4	—	—	—	112.3	0.22
HYQ-A-26-2p	7.3	3.52	2.07386	—	—	—	—	—	—	—	—
HYQ-E-4-1p	6.07	1.9	3.19474	—	—	—	—	—	—	—	—
HYQ-E-4-10m	5.3	2.3	2.30435	1.9	2.8	4.4	—	—	—	96.6	0.22
HYQ-E-4-11m	4.2	1.5	2.8	1.7	2.5	3.9	—	—	—	77.7	0.19
HYQ-E-4-12m	5.1	2	2.55	2.1	2.5	5.1	—	—	—	91	—
HYQ-E-4-13p	4.83	2.18	2.2156	—	—	—	—	—	—	—	—
HYQ-E-4-14m	4.6	1.9	2.42105	1.7	1.9	3.7	—	—	—	87	0.1
HYQ-E-4-15p	4.71	1.95	2.41538	—	—	—	—	—	—	—	—
HYQ-E-4-2m	5.9	2	2.95	1.5	2.4	5.1	—	—	—	91.6	0.14
HYQ-E-4-3p	3.76	1.96	1.91837	—	—	—	—	—	—	—	—
HYQ-E-4-4m	4.7	1.6	2.9375	1.5	2.1	3	—	—	—	104.5	0.17
HYQ-E-4-5p	5.43	1.66	3.27108	—	—	—	—	—	—	—	—
HYQ-E-4-6m	4.8	1.8	2.66667	2.3	1.7	3.2	—	—	—	116.3	0.09
HYQ-E-4-7m	4.2	1.6	2.625	1.4	2.3	4.4	—	—	—	110.4	0.1
HYQ-E-4-8p	4.01	2.04	1.96569	—	—	—	—	—	—	—	—
HYQ-E-4-9p	4.43	1.96	2.2602	—	—	—	—	—	—	—	—
HYQ-J-2-1m	6.1	3.6	1.69444	2.1	4	5.2	—	—	—	99.2	0.29
HYQ-J-2-2m	5.4	2.1	2.57143	2.2	3	4.9	—	—	—	75.4	0.05
HYQ-J-3-1p	6.91	2.69	2.56877	—	—	—	—	—	—	—	—
HYQ-J-3-2m	3.8	1.9	2	1.9	2.8	3.7	—	—	—	73.4	0.16
HYQ-J-3-3p	6.47	2.45	2.64082	—	—	—	—	—	—	—	—
HYQ-J-3-4p	5.1	2.04	2.5	—	—	—	—	—	—	—	—
HYQ-J-4-1m	4.3	2.1	2.04762	2.3	2	2.9	—	—	—	102.3	0.06
HYQ-J-4-10m	4.9	2.2	2.22727	1.7	3	4.4	—	—	—	88.6	0.15
HYQ-J-4-11m	5.1	2.6	1.96154	4.4	2.8	2.1	—	—	—	90.5	0.17
HYQ-J-4-12p	5.23	2.62	1.99618	—	—	—	—	—	—	—	—
HYQ-J-4-13p	5.29	2.75	1.92364	—	—	—	—	—	—	—	—
HYQ-J-4-14m	5.3	2.3	2.30435	1.4	2.6	4.8	—	—	—	106	0.14
HYQ-J-4-15m	5.5	2.2	2.5	1.3	2.1	5.3	—	—	—	77	0.12
HYQ-J-4-2m	5	2	2.5	1.8	2.8	4.1	—	—	—	91	0.15
HYQ-J-4-3m	4.4	1.9	2.31579	1.8	2.4	3.9	—	—	—	89.1	0.14
HYQ-J-4-4p	5.39	2.96	1.82095	—	—	—	—	—	—	—	—
HYQ-J-4-5m	4.5	2.3	1.95652	2.1	2.6	4.7	—	—	—	71.1	0.1
HYQ-J-4-6m	4.3	1.7	2.52941	1.5	3.2	4.7	—	—	—	71	0.18
HYQ-J-4-7m	4.4	1.9	2.31579	1.1	2.2	4.2	—	—	—	83	0.12
HYQ-J-4-8m	5.1	2	2.55	1.8	2.9	5.1	—	—	—	79.1	0.13
HYQ-J-4-9m	5.3	1.7	3.11765	1.8	2.1	3.6	—	—	—	118.5	0.22
HYQ-J-5-2p	5.65	2.7	2.09259	—	—	—	—	—	—	—	—
HYQ-J-5-3p	5.85	2.01	2.91045	—	—	—	—	—	—	—	—
HYQ-J-5-4m	6.4	1.5	4.26667	1.7	2.9	6.2	—	—	—	83.4	0.1
HYQ-J-5-5m	4.8	2.6	1.84615	2	2.8	4.4	—	—	—	83	0.11
HYQ-J-5-6m	4.6	1.6	2.875	1.5	2	3.4	—	—	—	103	0.16
HYQ-J-5-7m	4.6	1.6	2.875	2.6	2.4	2.9	—	—	—	106	0.16
HYQ-J-5-8p	5.23	2.19	2.38813	—	—	—	—	—	—	—	—
HYQ-J-5-9m	4.3	2.4	1.79167	1.4	2.5	4.1	—	—	—	79.4	0.13
HYQ-J-5-10m	4.3	1.7	2.52941	1.9	2.3	3.9	—	—	—	72.5	0.13
HYQ-J-6-1m	5.2	2.1	2.47619	1.8	2.6	4.5	—	—	—	96.5	0.14
HYQ-J-6-2m	5.6	2.4	2.33333	1.5	3	5.1	—	—	—	90.1	0.15
HYQ-J-6-3p	6.27	2.99	2.09699	—	—	—	—	—	—	—	—
HYQ-J-6-4m	5.3	2.3	2.30435	1.8	2.8	4.9	—	—	—	125.9	0.25
HYQ-J-6-5m	5.2	2.3	2.26087	2.1	3	4.4	—	—	—	102.4	0.16
HYQ-J-7-1m	3.8	1.4	2.71429	1.2	1.8	3	—	—	—	103.7	0.16
HYQ-J-7-2p	4.49	1.91	2.35079	—	—	—	—	—	—	—	—
HYQ-J-7-3p	4.47	1.95	2.29231	—	—	—	—	—	—	—	—
HYQ-J-8-1m	4.8	2	2.4	1.7	2.6	4.2	—	—	—	92.5	0.19
HYQ-J-8-2p	5.46	1.69	3.23077	—	—	—	—	—	—	—	—
HYQ-J-8-3p	6.38	2.46	2.5935	—	—	—	—	—	—	—	—
HYQ-J-8-4p	6.84	2.23	3.06726	—	—	—	—	—	—	—	—
HYQ-J-8-5m	5.1	2.3	2.21739	2.2	2.4	4.1	—	—	—	95.2	0.12
HYQ-J-8-6m	6.4	2	3.2	1.8	2.9	5.8	—	—	—	95.8	0.11
HYQ-J-8-7m	5.2	2	2.6	1.8	2.4	4.6	—	—	—	84	0.09
HYQ-J-10-8p	5.47	2.17	2.52074	—	—	—	—	—	—	—	—
HYQ-J-10-9m	4.6	2.1	2.19048	2.2	2.1	2.9	—	—	—	114.8	0.25
HYQ-J-10-10m	4.8	2	2.4	1.9	2.5	3.7	—	—	—	113.2	0.17
HYQ-J-11-1p	6.63	2.44	2.71721	—	—	—	—	—	—	—	—
HYQ-J-11-2m	5.1	1.4	3.64286	1.2	2.2	4.7	—	—	—	101	0.13
HYQ-J-11-3p	5.27	2.15	2.45116	—	—	—	—	—	—	—	—
HYQ-J-11-4m	5.1	1.6	3.1875	1.8	2.6	4.3	—	—	—	95	0.13
HYQ-J-11-5p	5.78	2.35	2.45957	—	—	—	—	—	—	—	—
HYQ-J-12-1m	—	—	—	—	—	—	20	37.1	116	—	—
HYQ-J-12-1p	5.09	2.14	2.3785	—	—	—	21.6	37.7	130	—	—
HYQ-J-12-2m	6	2.1	2.85714	1.2	2.5	5.4	23.8	—	—	130	0.21
HYQ-J-12-2p	5.53	1.93	2.86528	—	—	—	20	—	—	—	—
HYQ-J-12-3m	4.4	2.4	1.83333	2	2.8	3.3	—	—	—	115.4	0.26
HYQ-J-12-3p	5.04	2.21	2.28054	—	—	—	—	—	—	—	—
HYQ-J-12-4m	4.7	1.5	3.13333	1.4	2.1	4.1	31.9	—	—	102.3	0.11
HYQ-J-12-4p	5.52	2.01	2.74627	—	—	—	30.3	—	—	—	—
HYQ-J-12-5m	4.4	1.8	2.44444	1.3	2.1	4	—	—	—	119.3	0.13
HYQ-J-12-5p	4.91	1.88	2.6117	—	—	—	—	—	—	—	—
HYQ-6-1p	10.05	4.62	2.17532	—	—	—	—	—	—	—	—
HYQ-6-2m	3.9	4.3	0.906977	2.9	4.8	2.8	—	—	—	95.3	0.65
HYQ-7-1p	7.72	3.48	2.21839	—	—	—	12.7	24.3	128	—	—
HYQ-7-2p	7.34	2.97	2.47138	—	—	—	14.3	22.1	112	—	—
HYQ-7-3p	6.65	3.04	2.1875	—	—	—	12.3	22.7	118	—	—
HYQ-7-4p	6.52	2.78	2.34532	—	—	—	14.1	—	—	—	—
HYQ-7-5p	6.08	3.23	1.88235	—	—	—	—	—	—	—	—
HYQ-7-6p	5.76	2.09	2.75598	—	—	—	—	—	—	—	—
HYQ-8-1m	6	2.8	2.14286	2.5	3.4	4.8	—	—	—	105	0.3
HYQ-8-2p	6.8	2.8	2.42857	—	—	—	—	—	—		—
HYQ-8-3p	5.9	2	2.95	—	—	—	—	—	—	—	—
HYQ-8-4m	2.5	—	—	—	—	—	—	—	—	—	—
HYQ-10-1m	5.5	2.5	2.2	2.1	2.8	4.3	—	—	—	124.4	0.24
HYQ-10-2p	7.35	3.63	2.02479	—	—	—	—	—	—	—	—
HYQ-10-3m	8.3	2.3	3.6087	4.8	3.6	5.4	—	—	—	109.2	0.07
HYQ-10-4p	6.95	3.77	1.8435	—	—	—	—	—	—	—	—
HYQ-10-5m	5.7	2.5	2.28	2.3	3	4.2	—	—	—	120	0.2
HYQ-10-6m	3.6	3.3	1.09091	2.2	3.7	3.4	—	—	—	91.3	0.42
HYQ-10-7m	5.4	2.2	2.45455	2.4	2.2	3.8	—	—	—	117.1	0.11
HYQ-10-8m	3.7	2.2	1.68182	2.2	2.7	2	—	—	—	105	0.27
YLSNHM00974-1p	6.26	3.02	2.07285	—	—	—	—	—	—	—	—
YLSNHM00974-2p	4.75	2.72	1.74632	—	—	—	—	—	—	—	—
YLSNHM01205-1p	14	6	2.33333	—	—	—	—	—	—	—	—
YLSNHM01205-1m	12.3	5.2	2.36538	3.3	5.2	9.7	—	—	—	135	0.26
YLSNHM01205-1p	7.76	3.54	2.19209	—	—	—	—	—	—	—	—
YLSNHM01205-2p	5.47	2.11	2.59242	—	—	—	—	—	—	—	—
YLSNHM01205-3p	5.52	2.06	2.67961	—	—	—	—	—	—	—	—
YLSNHM01205-4p	8.07	3.05	2.6459	—	—	—	—	—	—	—	—
YLSNHM01205-5p	6.37	2.96	2.15203	—	—	—	—	—	—	—	—
YLSNHM01205-6m	5.2	2.5	2.08	2.7	2.5	3.7	—	—	—	116.4	0.09
YLSNHM01205-7m	5	2.7	1.85185	2.2	2.7	4.8	—	—	—	89.3	0.12
YLSNHM01205-8m	5.7	2.1	2.71429	2.9	2.5	3.3	—	—	—	142.8	0.18
YLSNHM01205-9m	5.2	3	1.73333	2.1	3.6	4.6	—	—	—	109.2	0.28
YLSNHM01205-10p	5.47	2.69	2.03346	—	—	—	—	—	—	—	—
YLSNHM01205-11p	7.13	2.91	2.45017	—	—	—	—	—	—	—	—
YLSNHM01205-12p	10.85	3.81	2.84777	—	—	—	—	—	—	—	—
YLSNHM01205-13p	6.28	2.74	2.29197	—	—	—	—	—	—	—	—
YLSNHM01205-14m	—	—	—	—	—	—	—	—	—	134.3	—
YLSNHM01205-15m	5.5	2.6	2.11538	2.2	3.1	4.3	—	—	—	135.2	0.22
YLSNHM01218-1p	6	3	2	—	—	—	—	—	—	—	—
YLSNHM01218-2p	7.1	2.2	3.22727	—	—	—	—	—	—	—	—
YLSNHM01218-3p	8.1	3	2.7	—	—	—	—	—	—	—	—
YLSNHM01218-4p	7	2.1	3.33333	—	—	—	—	—	—	—	—
YLSNHM01218-5m	3.8	3.7	1.02703	2.2	3.9	3	—	—	—	89	0.43
YLSNHM01218-6m	6.2	3.5	1.77143	3	3.2	4.6	—	—	—	113	0.18
YLSNHM01218-7p	5.1	1.4	3.64286	—	—	—	—	—	—	—	—
YLSNHM01219-1p	7.22	3.41	2.1173	—	—	—	—	—	—	—	—
YLSNHM01219-2p	7.67	2.91	2.63574	—	—	—	—	—	—	—	—
YLSNHM01219-3m	7.8	3.1	2.51613	3.7	3.2	5.2	—	—	—	127.1	0.11
YLSNHM01219-4m	5.5	1.7	3.23529	3.8	5.2	8.5	—	—	—	123.4
YLSNHM01229-1m	5.2	2.2	2.36364	1.9	2.4	3.8	—	—	—	125	0.21
YLSNHM01229-2p	5.2	3.6	1.44444	—	—	—	—	—	—	—	—
YLSNHM01229-3p	3.2	1	3.2	—	—	—	—	—	—	—	—
YLSNHM01229-4p	5.6	2.7	2.07407	—	—	—	—	—	—	—	—
YLSNHM01229-5p	5.6	3.2	1.75	—	—	—	—	—	—	—	—
YLSNHM01229-6p	6.1	2.2	2.77273	—	—	—	—	—	—	—	—
YLSNHM01233-1p	9.5	3.8	2.5	—	—	—	—	—	—	—	—
YLSNHM01233-2p	5.3	2.6	2.03846	—	—	—	—	—	—	—	—
YLSNHM01297-1m	3.2	4	0.8	2.4	3.7	2.6	—	—	—	133	0.54
YLSNHM01297-2m	5.6	2.7	2.07407	3	3	4	—	—	—	116	0.17
YLSNHM01297-3m	5.2	2.9	1.7931	3	2.7	3.6	—	—	—	98	0.15
YLSNHM01297-4m	6.3	2.9	2.17241	3.1	3.1	4.8	—	—	—	114	0.13

## Sheet:  turtle
Specimen number	ML	MW	ML/MW			Abbreviations
HYQ-A-4-1	2.9	2.41	1.20332			ML	maximum length
HYQ-A-4-2	1.51	2.43	0.621399			MW	maximum width
HYQ-A-4-3	3.07	2.25	1.36444			ML/MW	dimensionless
HYQ-A-6-1	3.24	1.92	1.6875
HYQ-A-6-10	1.2	2.7	0.444444
HYQ-A-6-11	1.62	2.52	0.642857
HYQ-A-6-12	1.9	2.5	0.76
HYQ-A-6-13	3.9	1.98	1.9697
HYQ-A-6-14	0.96	3.36	0.285714
HYQ-A-6-15	1.92	3.42	0.561404
HYQ-A-6-16	1.26	3.24	0.388889
HYQ-A-6-17	1.26	2.16	0.583333
HYQ-A-6-18	1.86	3.42	0.54386
HYQ-A-6-2	1.26	2.82	0.446809
HYQ-A-6-3	4.8	2.1	2.28571
HYQ-A-6-4	1.5	2.7	0.555556
HYQ-A-6-5	1.14	2.46	0.463415
HYQ-A-6-6	1.5	3	0.5
HYQ-A-6-7	1.08	2.04	0.529412
HYQ-A-6-8	2.22	3.24	0.685185
HYQ-A-6-9	1.92	2.34	0.820513
HYQ-A-11-1	1.94	2.23	0.869955
HYQ-A-11-10	2.18	2.32	0.939655
HYQ-A-11-11	2.32	2.93	0.791809
HYQ-A-11-2	1.24	1.75	0.708571
HYQ-A-11-3	1.62	2.37	0.683544
HYQ-A-11-4	3.95	1.9	2.07895
HYQ-A-11-5	1.12	1.31	0.854962
HYQ-A-11-6	1.05	2.84	0.369718
HYQ-A-11-7	2.97	2.04	1.45588
HYQ-A-11-8	2.06	>1.6	—
HYQ-A-11-9	0.72	2.4	0.3
HYQ-A-17-1	2	1.8	1.11111
HYQ-A-22	3.69	2.38	1.55042
HYQ-C-1-1	1.6	2.4	0.666667
HYQ-C-1-2	2.79	2.32	1.20259
HYQ-C-1-3	4.87	2.56	1.90234
HYQ-C-2-1	1.27	3.64	0.348901
HYQ-C-2-2	0.82	2.9	0.282759
HYQ-C-2-3	0.99	2.36	0.419492
HYQ-C-2-4	2.67	2.09	1.27751
HYQ-C-2-5	3.97	1.9	2.08947
HYQ-C-2-6	0.92	1.53	0.601307
HYQ-C-2-7	1.39	2.75	0.505455
HYQ-C-2-8	1.46	2.82	0.51773
HYQ-C-2-9	0.67	1.73	0.387283
HYQ-C-2-10	0.72	1.72	0.418605
HYQ-E-5-1	1.4	3	0.466667
HYQ-E-5-2	1.7	2.5	0.68
HYQ-E-5-3	1.1	2.2	0.5
HYQ-1-1	6.83	2.62	2.60687
HYQ-1-2	5.93	2.74	2.16423
HYQ-1-3	1.84	1.8	1.02222
HYQ-2-1	4.62	2.94	1.57143
HYQ-2-2	3.56	1.92	1.85417
HYQ-3	5.31	5.84	0.909247
HYQ-4	8.87	3.88	2.28608
HYQ-5	7.8	3.8	2.05263
YLSNHM00982	5.1	2.8	1.82143
YLSNHM00983	4.5	2.6	1.73077
YLSNHM01206-1	5.3	5	1.06
YLSNHM01206-2	3.08	3.08	1
YLSNHM01206-3	5	4.6	1.08696
YLSNHM01206-4	3.9	2.1	1.85714
YLSNHM01206-5	3.97	3.17	1.25237
YLSNHM01206-6	3.6	1.9	1.89474
YLSNHM01206-7	0.9	3.4	0.264706
YLSNHM01206-8	1.43	2.72	0.525735
YLSNHM01206-9	3.93	2.9	1.35517
YLSNHM01206-10	3.1	3.7	0.837838
YLSNHM01206-11	1.7	1.7	1
YLSNHM01206-12	5.5	3.9	1.41026
YLSNHM01206-13	1.5	4.6	0.326087
YLSNHM01206-14	3.79	2.37	1.59916
YLSNHM01206-15	2.2	2.8	0.785714
YLSNHM01266-1	4.46	2.66	1.67669
YLSNHM01266-2	6.17	2.78	2.21942
YLSNHM01266-3	4.99	3.02	1.65232
YLSNHM01266-4	2.57	2.82	0.911348
YLSNHM01267-1	3.3	2.6	1.26923
YLSNHM01267-2	4.3	1.9	2.26316
YLSNHM01267-3	3	2	1.5
YLSNHM01296	6.5	3.3	1.9697
YLSNHM01298	4.6	2.8	1.64286
YLSNHM01299	2.5	2.8	0.892857
YLSNHM01300-1	4.1	4.1	1
YLSNHM01300-2	1.4	1.9	0.736842
YLSNHM01301-1	2.8	2.1	1.33333
YLSNHM01301-2	4	2.3	1.73913
YLSNHM01301-3	1.8	1.7	1.05882
YLSNHM01302-1	5.3	2	2.65
YLSNHM01302-2	1.2	1.8	0.666667
YLSNHM01303-1	3.3	2.9	1.13793
YLSNHM01303-2	2.4	1.7	1.41176
YLSNHM01304	3.2	2.4	1.33333
YLSNHM01305	4.7	2.7	1.74074
YLSNHM01306-1	2.8	3.6	0.777778
YLSNHM01306-2	6.1	4.8	1.27083
YLSNHM01307-1	4.6	2	2.3
YLSNHM01307-2	1.1	2	0.55
YLSNHM01308-1	1.4	3.6	0.388889
YLSNHM01308-2	2.6	2.1	1.2381
YLSNHM01308-3	2.9	2.5	1.16
YLSNHM01308-4	3	2	1.5
YLSNHM01309	3.6	2.8	1.28571
YLSNHM01310-1	3.9	2.7	1.44444
YLSNHM01310-2	1.8	3.1	0.580645
YLSNHM01311	8?	2.7?	—
